# Supplementary material for: A Larger Sized Cup Accelerates Cartilage Erosion of Acetabulum after Bipolar Hemiarthroplasty in Elderly with Femur Neck Fracture
Source: Research Square preprint supplement (doi:10.21203/rs.3.rs-242724/v1), 2021-03-10
Supplement: Supplementary file 1 [file a1ab63f812272473530f66a9.xlsx]

## Sheet: Sheet1
수술일자	등록번호	성별	나이	Femur ap(mm)	femur width(mm)	Bipolar cup(mm)	1: large cup, 2: small cupt, 3: same	Harrison hip score	Cross leg	Squatting	Last f/up	Pain(point)	Initial cartilage	Post cartilage	medial intial	medial post
2010-03-19	00600826	M	75	50	51	51	1	77	++	++	2012-02-23	30	4.76	1.7	21.21	16.09
2010-04-07	01031282	M	65	51	51	51	3	86	++	++	2015-11-30	40	4.65	1.84	19.71	17.96
2010-04-07	00942251	F	67	43.5	43	44	1	78	++	+		30	7.8	4.24	20.19	13.65
2010-04-28	00821893	F	83	43	42.5	43	1	69	+	-		20	9.64	2.44	21.58	14.87
2010-04-30	01614610	F	57	48	49	48	2	88	+	+		30	3.76	2.47	15.98	13.62
2010-05-03	01050851	F	72	41	42	42	1	97	++	++		44	3.9	3.49	18.21	13.72
2010-05-17	01007327	F	79	46	46	46	3	89	+	+		44	3.85	2.42	17.31	9.06
2010-05-18	01505678	F	75	47	47	47	3	52	-	-		20	5.62	2.16	15.04	11.12
2010-06-21	01623558	F	80	43	43	43	3	84	+	+		40	4.4	3.16	13.93	13.25
2010-06-25	01624508	F	83	46	42	46	1	98	++	++		44	2.75	2.13	14.89	10.04
2010-09-15	01418520	M	70	46.5	46	47	1	87	++	++		30	4.56	2.53	24.56	20.85
2010-10-01	01642555	M	85	50	51	50	2	72	+	-	2015-06-01	20	4.58	1.99	25.71	18.13
2010-10-20	00815285	F	75	46.5	46	46	2	84	+	-		30	3.29	1.04	10.83	7.81
2010-11-01	00212077	F	80	42	42	42	3	72	+	+		30	1.92	0.64	14.41	11.7
2010-11-17	00940901	M	81	47.5	47	48	1	84	+	-	2011-11-24	30	6.35	5.46	23.37	17.93
2010-11-22	01347670	F	76	43	42.5	44	1	87	++	++	2012-01-12	30	5.13	1.84	16.82	13.07
2010-11-26	01215974	F	58	43.5	44	44	1	89	+	++		40	3.61	1.44	15.36	10.15
2010-12-15	01656379	F	65	44	44	44	3	98	++	++		40	6.89	2.81	20.44	19.06
2011-01-07	00298770	F	92	44	44	44	3	72	+	++	2014-04-21	40	2.64	2.26	18.85	16.14
2011-01-10	01300365	F	79	45.5	45	45	2	84	++	++		40	3.75	2.33	16.5	16.42
2011-01-17	01662944	F	62	45.5	46	46	1	87	++	++		40	5.17	3.58	17.2	13.06
2011-01-21	01346796	F	78	42	42	42	3	73	+	++		30	4.6	2.37	18.4	13.13
2011-02-18	01668140	F	72	44	43	44	1	72	++	++		30	3.34	1.725	13.96	10.37
2011-02-23	01669617	F	89	43	43	43	3	79	++	++		40	3.74	2.53	15.93	12.96
2011-03-04	01309746	F	78	44	44	44	3	50	-	+		10	4.18	3	12.7	12.61
2011-03-09	01672017	M	65	53	52.7	53	1	87	+	+		30	6.55	2.83	29.65	20.04
2011-03-30	00618835	F	75	44.3	45.3	46	1	74	+	+		30	3.74	1.61	12.98	10.05
2011-04-06	01568734	F	79	44.5	44.5	44	2	49	-	-		10	5.91	2.84	14.99	12.16
2011-04-06	01118143	M	90	47.5	47.5	47	2	86	+	+		40	5.71	2.11	19.2	14.36
2011-04-12	00234787	F	92	48	48	48	3	78	+	+		30	5.13	2.15	16.36	14.84
2011-05-23	01674563	F	79	42	42.5	43	1	69	+	++	2012-10-01	20	7.06	2.81	15.03	11.87
2011-06-22	00904209	F	68	46	46	46	3	60	+	+		20	3.46	2.54	10.7	6.49
2011-06-27	01571924	F	84	45.5	46	45	2	56	-	-		10	4.66	2.74	13.51	12.09
2011-07-18	00296440	F	74	48	48.5	48	2	89	++	+		40	6.7	3.92	15.55	13.33
2011-08-03	01695555	F	63	42	48.5	42	2	98	++	++		44	5.64	2.5	16.5	11.52
2011-08-24	00494894	F	59	45	45	45	3	89	++	++	2012-07-11	40	5.32	3.53	17.22	14.99
2011-08-29	01495136	M	76	51	51.5	51	2	52	+	-		30	8.25	4.51	23.16	18.63
2011-08-31	00056277	F	78	44.5	44.7	51	1	84	+	+		40	2.85	2.31	12.35	9.84
2011-10-17	01380609	F	62	42	42	42	3	91	++	+		44	5.44	1.78	18.04	10.07
2011-10-17	01551557	M	75	52	50	52	1	75	+	+		40	6.07	3.4	12.27	10.91
2011-10-24	00975776	F	57	44.5	45	44	2	97	++	++		44	3.04	2.29	15.82	11.06
2011-10-26	01715140	F	77	44	44	44	3	74	+	+		40	4.01	2.01	13.06	13.06
2011-10-31	01715728	M	76	52	52.5	52	2	69	+	-		30	5.84	2.92	18.37	12.13
2011-10-31	01715909	F	84	44	43.5	44	1	61	+	+		30	3.42	0.8	9.99	8.4
2011-11-07	01716582	M	83	52.5	53	53	1	79	++	++		40	3.15	1.44	18.83	16.9
2011-11-09	01678965	M	84	51	50.5	51	1	85	++	+		30	2.97	1.68	18.4	17.7
2011-12-19	01511079	F	74	47	46.5	47	1	75	++	+		30	4.52	0.8	22.34	9.2
2011-12-26	01503767	F	76	43.5	43.5	44	1	58	-	-		20	3.34	0.9	22.14	16.09
2012-01-02	01528563	M	83	53.5	53	54	1	68	+	++		40	6.07	1.89	21.78	16.04
2012-01-09	01103867	F	60	45.5	45.5	45	2	83	++	++		40	2.55	0.45	12.36	7.4
2012-02-29	01585822	M	73	50.7	51	51	1	77	+	+		30	4.36	1.15	20.4	16.18
2012-03-19	00254150	F	75	44.5	44.8	45	1	86	++	++		44	3.75	3.3	21.11	16.65
2012-03-19	00792079	F	83	43.5	44	48	1	61	+	-		30	5.18	3.26	21.14	14.35
2012-04-02	01745233	F	74	42	42	42	3	69	+	+		30	4.86	2.78	25	11.09
2012-04-30	01751060	F	93	46.5	45	43	2	65	+	-		30	5.13	2.15	19.34	10.19
2012-05-07	01444127	F	91	45	45	45	3	92	++	++	2016-10-11	44	7.29	4.64	21.54	12.5
2012-05-14	01693054	M	75	50	50	50	3	93	++	++		44	5.05	4.13	20.23	15.46
2012-06-11	00002974	F	96	42	41	42	1	68	++	+		30	4.6	3.2	17.46	12.7
2012-07-18	01477213	F	74	42.5	43	43	1	91	++	++		40	4.09	3.57	15.62	12.38
2012-08-03	00925062	M	89	49	51.5	50	2	61	+	+		30	5.17	4.12	17.84	13.96
2012-08-20	00925062	M	89	49	49	49	3	61	+	-		20	4.69	3.9	16.43	13.65
2012-10-31	01546044	F	73	46.5	47	47	1	70	+	+	2013-11-12	40	4.25	3.45	15.2	13.29
2012-11-05	01771660	F	81	45	45	45	3	75	+	+		30	6.04	4.82	16.9	13.71
2012-11-12	00055454	F	78	42	42	42	3	88	++	+		40	3.55	3.13	14.52	12.08
2012-11-19	01404317	M	84	52	52	52	3	85	++	+		40	4.89	4.26	15.88	12.66
2012-12-12	00841278	M	63	50	50	50	3	86	++	+		40	3.5	2.97	12.5	11.17
2012-12-17	01794529	F	84	50	50	50	3	62	+	-		30	5.82	4.46	19.41	15.67
2012-12-24	00059336	F	70	45	45	45	3	70	+	+		40	4.76	4.05	18.64	15.19
2012-12-26	01527142	F	72	41.5	44	44	1	74	+	+		40	3.4	3.1	9.64	8.41
2013-02-13	00257804	F	77	47.5	47.5	47	2	76	++	++	15.10.21	30	3.24	2.86	15.24	10.60
2013-04-17	01336194	F	88	44.5	44.5	44	2	69	++	++	14.03.18	30	0.9	0.9	14.08	10.73
2013-06-26	01827569	F	87	45	45	45	3	21	-	-	15.03.03	10	1.5	1.4	10.82	13.83
2013-07-22	01580682	F	67	43	44	48	1	99	++	++	16.06.21	44	1.7	1.6	6.95	5.38
2013-10-02	01123415	M	78	52	52	52	3	95	++	++	16.06.09	44	0.51	0.46	21.53	15.32
2013-10-21	01326908	M	78	47	47	47	3	89	++	+	17.07.25	44	0.71	0.32	18.07	14.43
2014-01-22	00554782	F	87	44.5	44.5	44	2	88	++	+	15.08.20	40	1.63	1.21	16.37	12.17
2014-02-28	01879096	F	81	48.5	48.0	48	2	64	-	-	16.11.08	30	1.41	1.40	13.71	11.11
2014-03-05	01843244	F	74	42	42.5	43	1	97	+	++	17.11.02	44	1.90	1.83	19.49	16.22
2014-03-10	01880954	F	83	45	45	46	1	81	++	++	16.10.18	40	1.00	0.93	10.98	9.51
2014-04-30	01859816	M	55	53	53	53	3	90	++	++	15.05.26	44	2.5	2.41	27.08	20.44
2014-05-12	01263299	F	81	45	45	45	3	75	++	+	17.10.24	30	1.89	1.46	13.59	11.23
2014-05-12	01891643	F	77	46	46	46	3	75	+	+	15.08.18	30	1.46	1.46	17.49	18.29
2014-07-30	00948886	M	75	50	50	50	3	87	-	+	16.02.12	44	1.11	1.11	15.75	12.21
2014-09-01	01476662	F	80	45	45	45	3	37	-	-	15.09.17	10	1.05	0.73	12.57	9.53
2014-10-08	01690419	M	77	47	46	47	1	40	+	++	17.04.11	20	1.52	1.05	22.35	10.70
2014-10-08	01765200	F	77	40.5	40.5	40	2	74	++	++	16.05.17	30	0.90	0.90	20.31	15.62
2014-11-17	00299040	F	82	46.5	47	47	1	68	+	+	16.08.23	30	1.20	1.20	14.11	11.54
2014-12-10	01484306	F	84	44	44	44	3	78	++	+	17.06.15	40	0.48	0.47	10.10	7.55
2015-01-19	01931763	F	83	42	42	42	3	84	++	++	16.08.30	40	0.66	0.65	18.63	17.14
2015-02-02	01943017	F	85	45	45	45	3	86	+	+	16.02.16	44	1.10	0.98	16.16	17.91
2015-02-09	01524348	F	79	42.5	43	44	1	83	+	+	16.01.12	44	2.07	0.79	16.46	13.62
2015-02-11	00616378	M	84	53.5	53.5	54	1	85	++	++	17.09.05	44	1.15	1.14	23.5	23.66
2015-02-11	00662174	F	79	43	42.5	43	1	88	++	++	16.10.25	44	0.60	0.33	13.70	10.37
2015-03-25	01781951	F	82	47	47	47	3	78			17.09.19	30	1.43	1.39	18.51	17.60
2015-04-29	01959713	F	77	42.5	43	43	1	65	-	-	17.05.30	30	1.42	1.33	16.87	11.78
2015-05-13	00820289	F	75	47	46.5	47	1	83	+	++	16.12.13	40	1.40	1.39	19.26	16.21
2015-06-24	01607949	F	92	49	49	49	3	61	+	++	16.03.15	30	0.86	0.86	16.72	16.95
2015-07-13	01840986	M	70	52	52	52	3	92	+	+	17.06.13	44	1.72	1.63	18.82	18.25
2015-08-03	00003166	F	70	43.5	43.5	43	2	88	+	-	17.11.07	44	0.63	0.60	11.74	12.53
2015-08-26	01071102	F	85	45	45	45	3	71	+	+	16.07.26	40	0.33	0.33	17.57	13.83
2015-08-31	01174347	F	81	44	44.5	44	2	80	-	-	17.09.26	40	0.80	0.79	15.28	13.03
2015-09-02	01125445	F	81	44	44	44	3	92	++	++	16.11.24	44	0.65	0.59	21.55	15.53
2015-09-07	01431121	F	59	43.5	43.5	43	2	58	-	-	17.10.12	20	0.73	0.71	14.12	12.66
2015-09-21	00167801	F	76	47	47	47	3	83	-	+	16.08.04	40	2.50	2.28	14.47	11.45
2015-11-23	00742173	F	81	52	52	52	3	52	+	+	17.06.20	20	0.80	0.79	11.23	7.14
2015-12-28	01673308	M	73	51	51	51	3	88	++	++	17.11.09	44	0.95	0.90	22.57	19.86
2015-12-30	01835930	M	62	51	51	51	3	87	+	++	17.11.14	40	2.08	1.47	26.88	20.28
2016-02-05	01686084	M	82	51	51	51	3	83	+	+	17.01.26	40	1.15	0.94	24.88	21.61
2016-03-25	01417555	F	67	47	47.5	47	2	94	+	+	17.09.19	44	0.86	0.85	17.71	14.30
2016-03-30	01244495	F	58	46	46.5	46	2	74	-	-	17.06.20	30	1.75	1.75	15.77	14.15
2016-04-01	00170575	F	83	44	44	45	1	65	-	+	17.10.31	30	1.31	1.31	16.76	12.35
2016-04-27	00418492	F	81	46	47	46	2	37	-	-	17.05.16	10	1.84	1.52	22.37	11.60
2016-05-04	00829169	M	78	47.5	47.5	48	1	62	-	++	17.06.20	30	0.94	0.93	17.10	14.79
2016-05-09	01337408	F	96	43	43	43	3	70	+	+	17.06.01	30	0.82	0.62	21.82	15.96
2016-05-16	01919962	M	84	49	49	49	3	89			16.06.21	40	1.24	1.18	21.32	21.33
2016-05-16	02035084	M	76	53.5	53.5	53	2	74	++	++	17.10.25	44	1.46	1.46	22.53	12.49
2016-07-29	01704344	F	65	45	45	45	3	78	+	++	17.08.17	30	0.53	0.15	10.18	9.27
			77.75
